# Supplementary material for: Effects of Color Temperature and Brightness on Electroencephalogram Alpha Activity in a Polychromatic Light-emitting Diode
Source: PubMed Central journal article supplement — Clin Psychopharmacol Neurosci. 2013 Dec 24;11(3):126–31. doi: 10.9758/cpn.2013.11.3.126 (PMC3897760; doi:10.9758/cpn.2013.11.3.126), 2013-12-24
Supplement: cpn-11-126-s001.pdf [file cpn-11-126-s001.pdf]

**Supplementary Table 1.** Repeated-measures ANOVA on alpha power during relaxing conditions

|    | Variable | F     | <i>p</i> value |
|----|----------|-------|----------------|
| Fz | CT       | 1.130 | 0.296          |
|    | B        | 0.065 | 0.800          |
|    | CT×B     | 0.536 | 0.470          |
| Oz | CT       | 0.540 | 0.468          |
|    | B        | 0.403 | 0.530          |
|    | CT×B     | 2.671 | 0.112          |

ANOVA, analysis of variance; CT, color temperature; B, brightness.
